# Supplementary material for: Neural network potentials for accelerated metadynamics of oxygen reduction kinetics at Au–water interfaces
Source: Royal Society of Chemistry journal article supplement (doi:10.1039/d2sc06696c), 2023-01-01
Supplement: d2sc06696c2.pdf [file d2sc06696c2.pdf]

# Neural Network Potentials for Accelerated Metadynamics of Oxygen Reduction Kinetics at Au-Water Interfaces

Xin Yang, Arghya Bhowmik, Tejs Vegge, and Heine Anton Hansen\*

Department of Energy Conversion and Storage, Technical University of Denmark, Anker  
Engelunds Vej, 2800Kgs. Lyngby, Denmark

February 22, 2023

# 1 Supplementary Tables

Table S1: Parameters for calculating coordination numbers of O<sub>2</sub>

| CV          | Definition                                                                                                                       | Parameters                                                                               |
|-------------|----------------------------------------------------------------------------------------------------------------------------------|------------------------------------------------------------------------------------------|
| $C_{O_2-O}$ | $C_{O_2-O} = \sum_{i \in O_2} \frac{1 - \left(\frac{r_{i,O} - d_0}{r_0}\right)^n}{1 - \left(\frac{r_{i,O} - d_0}{r_0}\right)^m}$ | $r_{i,O}$ : distance between O <sub>i</sub> and O<br>$r_0 = 1.8, d_0 = 0, n = 6, m = 12$ |
| $C_{O_2-H}$ | $C_{O_2-H} = \sum_{i \in O_2} \frac{1 - \left(\frac{r_{i,H} - d_0}{r_0}\right)^n}{1 - \left(\frac{r_{i,H} - d_0}{r_0}\right)^m}$ | $r_{i,H}$ : distance between O <sub>i</sub> and H<br>$r_0 = 1.5, d_0 = 0, n = 8, m = 16$ |

Table S2: A summary of test error metrics of neural network potentials

| Model    | Node size | Layers | Energy error (meV/atom) |      | Forces error (meV/Å) |            |      |      |
|----------|-----------|--------|-------------------------|------|----------------------|------------|------|------|
|          |           |        | MAE                     | RMSE | $l_2$ MAE            | $l_2$ RMSE | MAE  | RMSE |
| NNP1     | 96        | 3      | 0.6                     | 1.3  | 32.8                 | 46.4       | 16.3 | 26.8 |
| NNP2     | 112       | 3      | 0.5                     | 1.3  | 31.3                 | 45.0       | 15.5 | 26.0 |
| NNP3     | 128       | 3      | 0.8                     | 1.4  | 28.9                 | 43.7       | 14.3 | 25.2 |
| NNP4     | 128       | 4      | 0.4                     | 1.2  | 25.4                 | 39.3       | 12.6 | 22.7 |
| NNP5     | 144       | 3      | 0.5                     | 1.2  | 27.0                 | 40.8       | 13.4 | 23.5 |
| Ensemble | -         | -      | 0.7                     | 1.4  | 25.3                 | 38.8       | 12.6 | 22.4 |

Table S3: A summary of interface structures presented in the final dataset after CUR selection

| Interface structure                         | Number of atoms |    |       | Number of configurations |            |       | $E_{MAE}$<br>(meV/atom) | $F_{MAE}$<br>(meV/Å) |
|---------------------------------------------|-----------------|----|-------|--------------------------|------------|-------|-------------------------|----------------------|
|                                             | H               | O  | Total | Training                 | Validation | Total |                         |                      |
| Au(100)-30H <sub>2</sub> O                  | 60              | 30 | 126   | 616                      | 70         | 686   | 2.3                     | 14.2                 |
| Au(100)-1OH/29H <sub>2</sub> O              | 59              | 30 | 125   | 1535                     | 172        | 1707  | 1.4                     | 12.8                 |
| Au(100)-2OH/28H <sub>2</sub> O              | 58              | 30 | 124   | 646                      | 74         | 1694  | 1.1                     | 14.0                 |
| Au(100)-1O <sub>2</sub> /30H <sub>2</sub> O | 60              | 32 | 126   | 1192                     | 136        | 1328  | 1.6                     | 13.8                 |
| Au(100)-1OH/58H <sub>2</sub> O              | 117             | 59 | 240   | 1458                     | 155        | 1613  | 0.7                     | 11.6                 |
| Au(100)-2OH/57H <sub>2</sub> O              | 116             | 59 | 239   | 1541                     | 153        | 1694  | 0.6                     | 11.6                 |
| Au(100)-3OH/56H <sub>2</sub> O              | 115             | 59 | 238   | 1667                     | 209        | 1876  | 0.5                     | 12.1                 |
| Au(100)-4OH/55H <sub>2</sub> O              | 114             | 59 | 237   | 2188                     | 245        | 2433  | 0.3                     | 12.4                 |
| Au(100)-5OH/54H <sub>2</sub> O              | 113             | 59 | 236   | 2110                     | 232        | 2342  | 0.3                     | 12.9                 |
| Au(100)-6OH/53H <sub>2</sub> O              | 112             | 59 | 235   | 1986                     | 229        | 2215  | 0.3                     | 13.8                 |
| Au(100)-1O <sub>2</sub> /57H <sub>2</sub> O | 114             | 59 | 237   | 1826                     | 188        | 2014  | 0.4                     | 12.0                 |

Table S4: Comparison of model performance between previous studies and this work

| Ref.                          | System                                        | Method    | Max. $N_{atom}$ | Training set                                                                                                                                                                                                                                                                                                                                                                                                                                                               | Errors                                                                                                                                            |
|-------------------------------|-----------------------------------------------|-----------|-----------------|----------------------------------------------------------------------------------------------------------------------------------------------------------------------------------------------------------------------------------------------------------------------------------------------------------------------------------------------------------------------------------------------------------------------------------------------------------------------------|---------------------------------------------------------------------------------------------------------------------------------------------------|
| Natarajan et al. <sup>1</sup> | Cu-H <sub>2</sub> O                           | BPNNP     | 463             | 10293 structures with bulk water/ice, bulk copper/cuprous oxide and water-copper interface geometries. 10% are used for validation.                                                                                                                                                                                                                                                                                                                                        | $E_{RMSE}$ : 0.9 meV/atom<br>$F_{RMSE}$ : 125.3 meV/Å                                                                                             |
| Quaranta et al. <sup>2</sup>  | ZnO-H <sub>2</sub> O                          | BPNNP     | 334             | 15319 structures with bulk water, bulk ZnO, and ZnO-water interface geometries. 1712 configurations are used for validation.                                                                                                                                                                                                                                                                                                                                               | $E_{RMSE}$ : 1.2 meV/atom<br>$F_{RMSE}$ : 143.4 meV/Å                                                                                             |
| Yang et al. <sup>3</sup>      | Urea-water                                    | DeepMD    | 110             | 14536 structures with 5739 reactant structures, 5217 product structures, and 3580 transition state structures.                                                                                                                                                                                                                                                                                                                                                             | $E_{MAE}$ : 0.7 meV/atom<br>$F_{MAE}$ : 38 meV/Å                                                                                                  |
| He et al. <sup>4</sup>        | SrTiO <sub>3</sub>                            | DeepMD    | 40              | 2600 structures with $2 \times 2 \times 2$ and $1 \times 1 \times 1$ supercells. A test set with 1500 structures of 80 atoms are used for validation.                                                                                                                                                                                                                                                                                                                      | $E_{MAE}$ : 0.3 meV/atom<br>$F_{MAE}$ : 19 meV/Å                                                                                                  |
| Liu et al. <sup>5</sup>       | $\beta$ Ga <sub>2</sub> O <sub>3</sub>        | GAP       | 160             | 801 training structures obtained from MD simulations at temperatures between 100 K and 1000 K. 90 structures are used for validation.                                                                                                                                                                                                                                                                                                                                      | $E_{RMSE}$ : 0.5 meV/atom<br>$F_{RMSE}$ : 50 meV/Å for Ga<br>$F_{RMSE}$ : 38 meV/Å for O                                                          |
| Davidson et al. <sup>6</sup>  | $\alpha$ Fe – H                               | GAP       | 128             | The training data for the H-Fe interaction potential comprises snapshots from molecular dynamics trajectories of 54 and 128 Fe atoms with either 0, 1, or 2 Fe atoms removed, and a single H atom added. Altogether, about 400 configurations were used in the fit, comprising about 28k atoms.                                                                                                                                                                            | $E_{MAE}$ : 20 meV<br>$F_{MAE}$ : 10 meV/Å                                                                                                        |
| Hu et al. <sup>7</sup>        | OC20 dataset <sup>8</sup>                     | ForceNet  | 225             | OC20 dataset <sup>8</sup> contains 200M+ nonequilibrium 3D atomic structures with average atom number of 73.3 from 1M+ atomic relaxation trajectories. The model is trained on 134M structures from S2F task. Four validation datasets are used to test the model performance: In Domain (ID), Out of Domain Adsorbate (OOD Adsorbate), OOD Catalyst, and OOD Both (both the adsorbate and catalyst’s material are not seen in training). Each split contains 1M examples. | $F_{MAEs}$<br>ID: 28.1 meV/Å<br>OOD Ads.: 32.0 meV/Å<br>OOD Cat.: 32.7 meV/Å<br>OOD Both: 41.2 meV/Å<br>Average: 33.5 meV/Å                       |
| Gasteier et al. <sup>9</sup>  | OC20 dataset                                  | GemNet-OC | 225             | The model is trained on 134M structures from S2EF task in OC20 dataset. The same test set splits are used as above.                                                                                                                                                                                                                                                                                                                                                        | Average:<br>$E_{MAE}$ : 233 meV<br>$F_{MAE}$ : 20.7 meV/Å                                                                                         |
| Li et al. <sup>10</sup>       | Water                                         | GAMD      | 384             | 7000 periodic configurations of liquid water. The number of water molecules in the unit cell ranges from 16 to 128. 723 snapshots are used for validation.                                                                                                                                                                                                                                                                                                                 | $F_{MAE}$ : $24.28 \pm 16.80$ meV/Å<br>$F_{RMSE}$ : $35.39 \pm 23.09$ meV/Å                                                                       |
| Batzner et al. <sup>11</sup>  | Li <sub>4</sub> P <sub>2</sub> O <sub>7</sub> | Nequip    | 208             | The crystal structure was melted at 3000 K for 50 ps, and quenched at 600 K for another 50 ps, resulting a dataset of 25,000 AIMD frames. 1000 structures from melting phase are used for training, 100 structures for validation, and all remaining structures for independent test.                                                                                                                                                                                      | Melt(quench):<br>$E_{MAE}$ : 0.4(0.5) meV/atom<br>$F_{MAE}$ : 34.0(21.3) meV/Å<br>$E_{RMSE}$ : 0.8(0.5) meV/atom<br>$F_{RMSE}$ : 59.5(34.9) meV/Å |
| Ours                          | Au-water                                      | PaiNN     | 240             | 18371 Au(100)-water interface structures with different number of *OH and O <sub>2</sub> presented in the liquid. The rare event structures in metadynamics are also included.                                                                                                                                                                                                                                                                                             | $E_{MAE}$ : 0.7 meV/atom<br>$F_{MAE}$ : 12.6 meV/Å<br>$E_{RMSE}$ : 1.4 meV/atom<br>$F_{RMSE}$ : 22.4 meV/Å                                        |

Table S5: Adsorption energies of different species on Au(100) surface

| Species         | Cell size | $\theta$ (Coverage) | $\Delta E/n_{\text{OH}}$ (eV) |
|-----------------|-----------|---------------------|-------------------------------|
| 1OH             | (4×4)     | 0.063               | 0.717                         |
| 2OH             | (4×4)     | 0.125               | 0.795                         |
| 3OH             | (4×4)     | 0.188               | 0.862                         |
| 4OH             | (4×4)     | 0.250               | 0.925                         |
| 5OH             | (4×4)     | 0.313               | 0.958                         |
| 6OH             | (4×4)     | 0.375               | 0.987                         |
| 1O <sub>2</sub> | (4×4)     | 0.063               | -1.008                        |
| 1OH             | (3×3)     | 0.111               | 0.723                         |
| 2OH             | (3×3)     | 0.222               | 0.858                         |

Table S6: Coordination numbers of different possible intermediate structures in ORR

| CV          | *O <sub>2</sub> | *OOH | *O + *OH | *O <sub>2</sub> H <sub>2</sub> | *OH |
|-------------|-----------------|------|----------|--------------------------------|-----|
| $C_{O_2-O}$ | 1               | 1    | 0        | 1                              | 0   |
| $C_{O_2-H}$ | 0               | 0.5  | 0.5      | 1                              | 1   |



## 2 Supplementary Figures

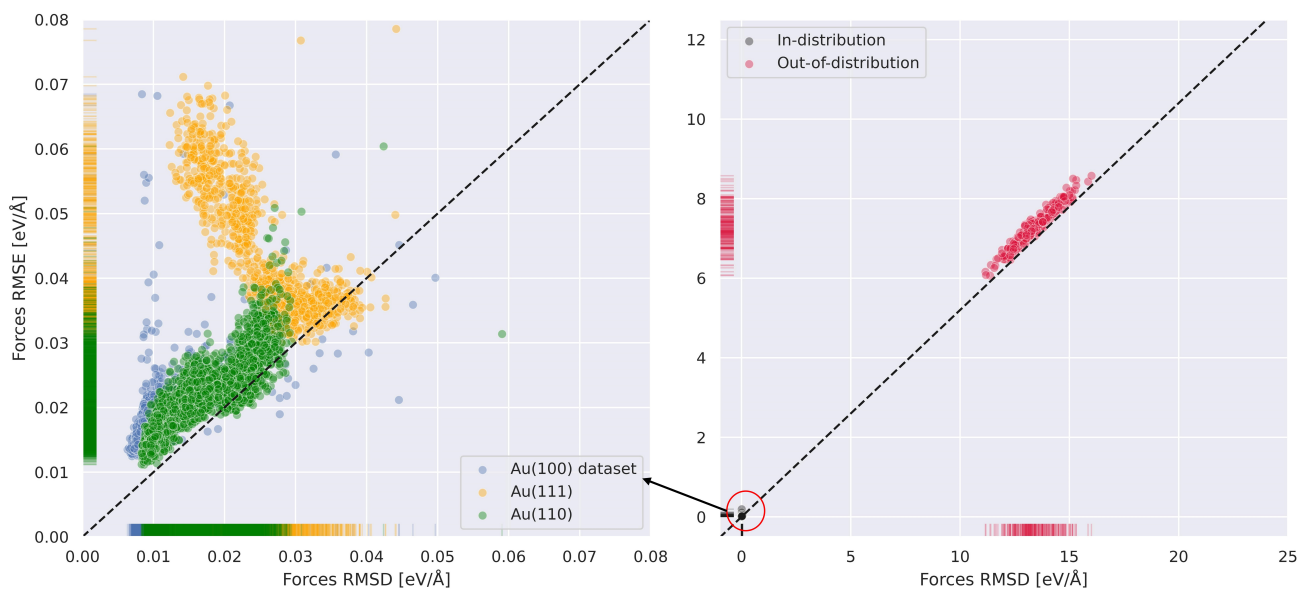

Figure S1: Comparison between ensemble uncertainties calculated by forces root mean square deviation (RMSD) and true prediction error calculated by root mean square error (RMSE) for (a) in-distribution data, and (b) out-of-distribution data.

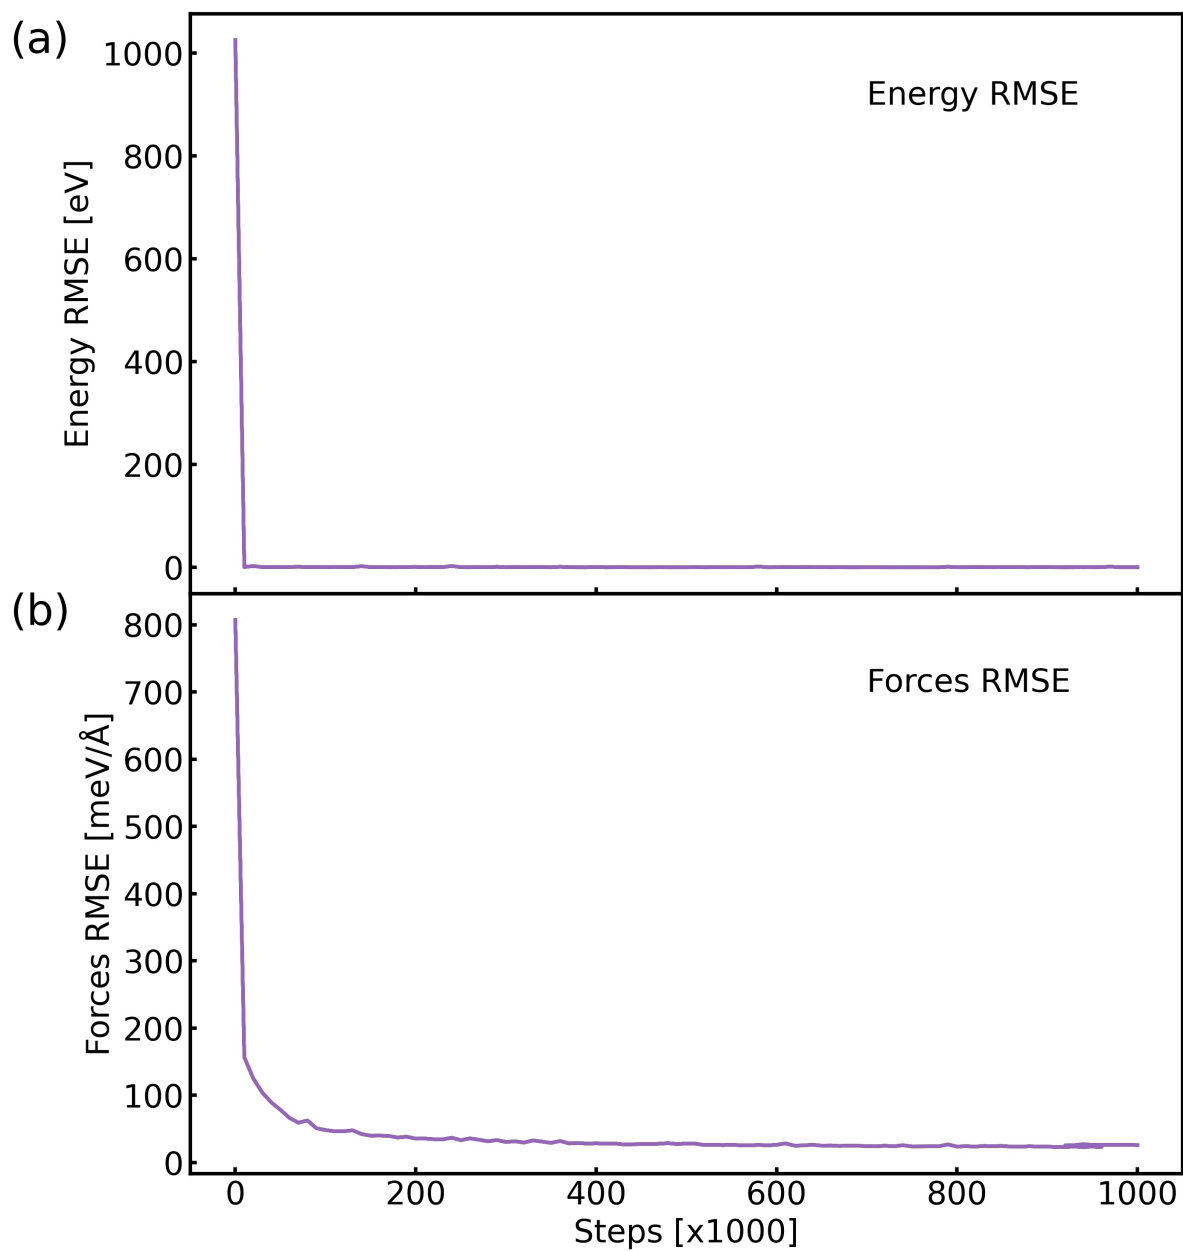

Figure S2: Training curves of the final dataset for (a) energy root mean squared error (RMSE) and (b) forces RMSE

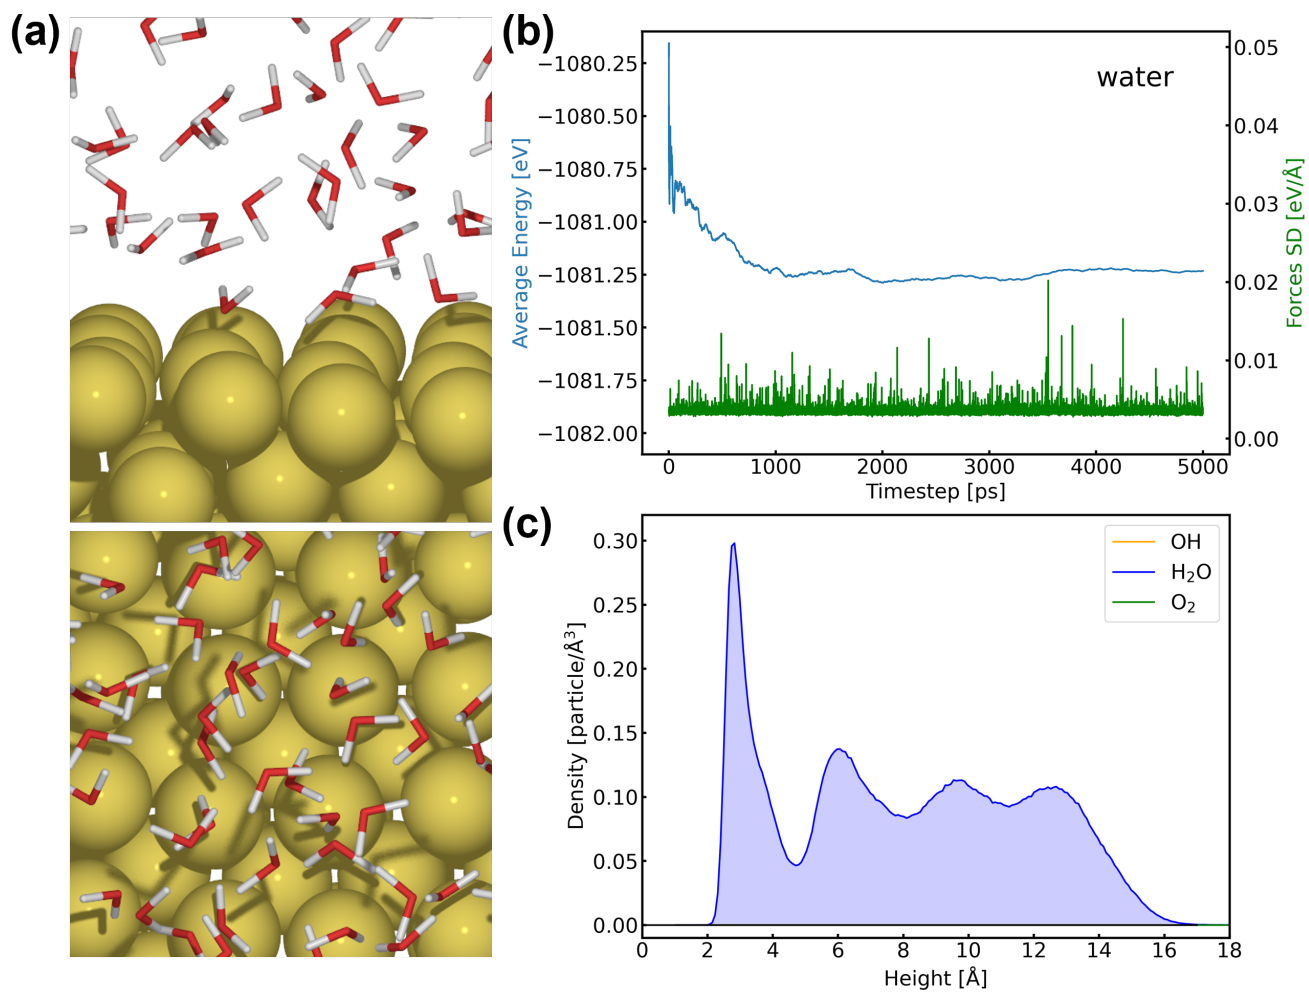

Figure S3: (a) Side view and top view of Au(100)-59H<sub>2</sub>O interface structure. (b) Evolution of average energy and force standard deviations (SD) of Au(100)-59H<sub>2</sub>O along 5 ns MD simulations. (c) Density profiles of different species as a function of the distance from Au(100) surface.

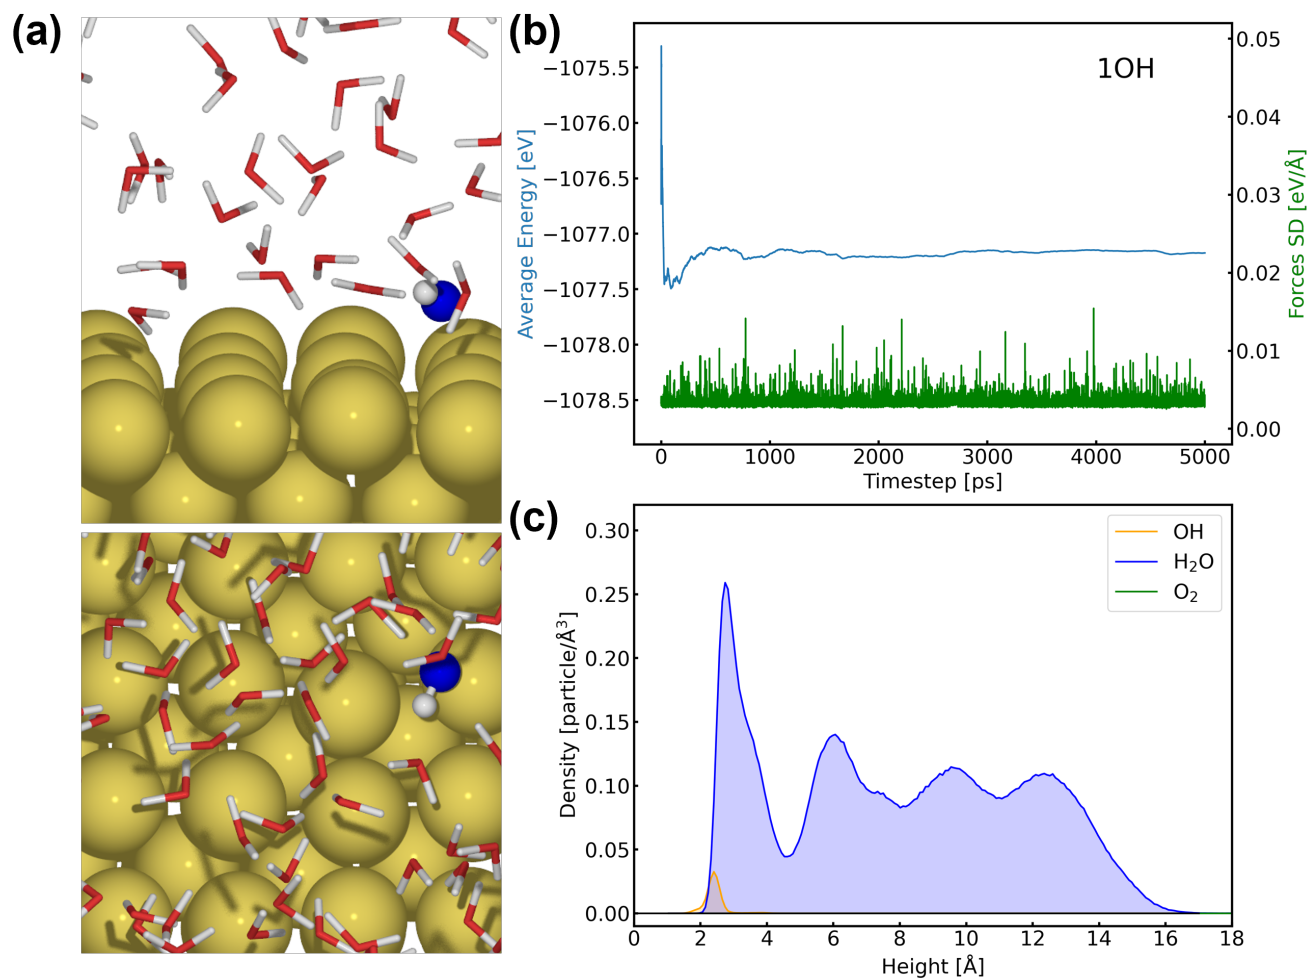

Figure S4: (a) Side view and top view of Au(100)-1OH/58H<sub>2</sub>O interface structure. (b) Evolution of average energy and force standard deviations (SD) of Au(100)-1OH/58H<sub>2</sub>O along 5 ns MD simulations. (c) Density profiles of different species as a function of the distance from Au(100) surface.

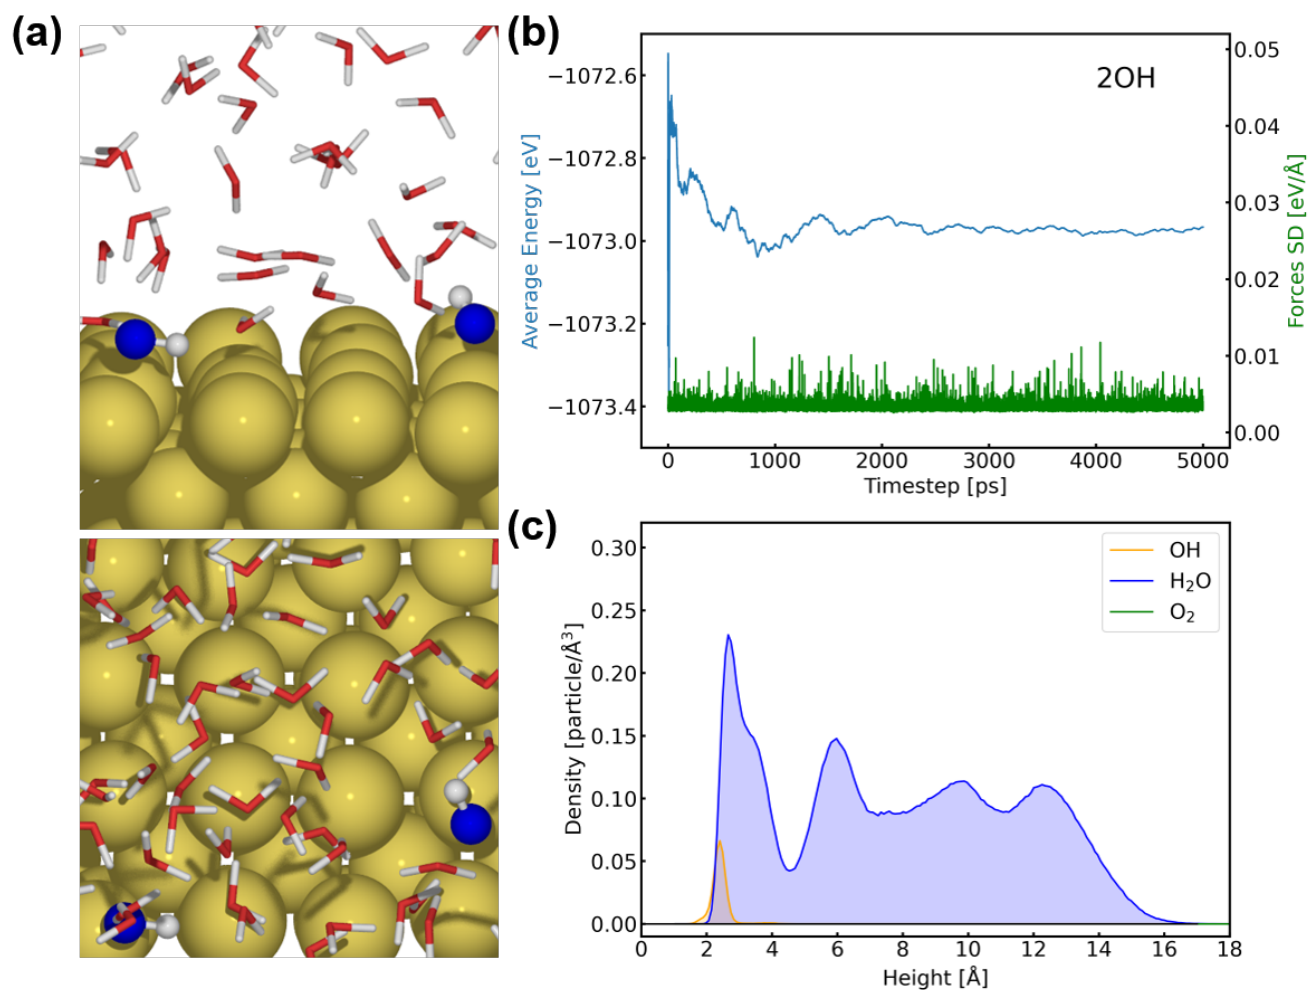

Figure S5: (a) Side view and top view of Au(100)-2OH/57H<sub>2</sub>O interface structure. (b) Evolution of average energy and force standard deviations (SD) of Au(100)-2OH/57H<sub>2</sub>O along 5 ns MD simulations. (c) Density profiles of different species as a function of the distance from Au(100) surface.

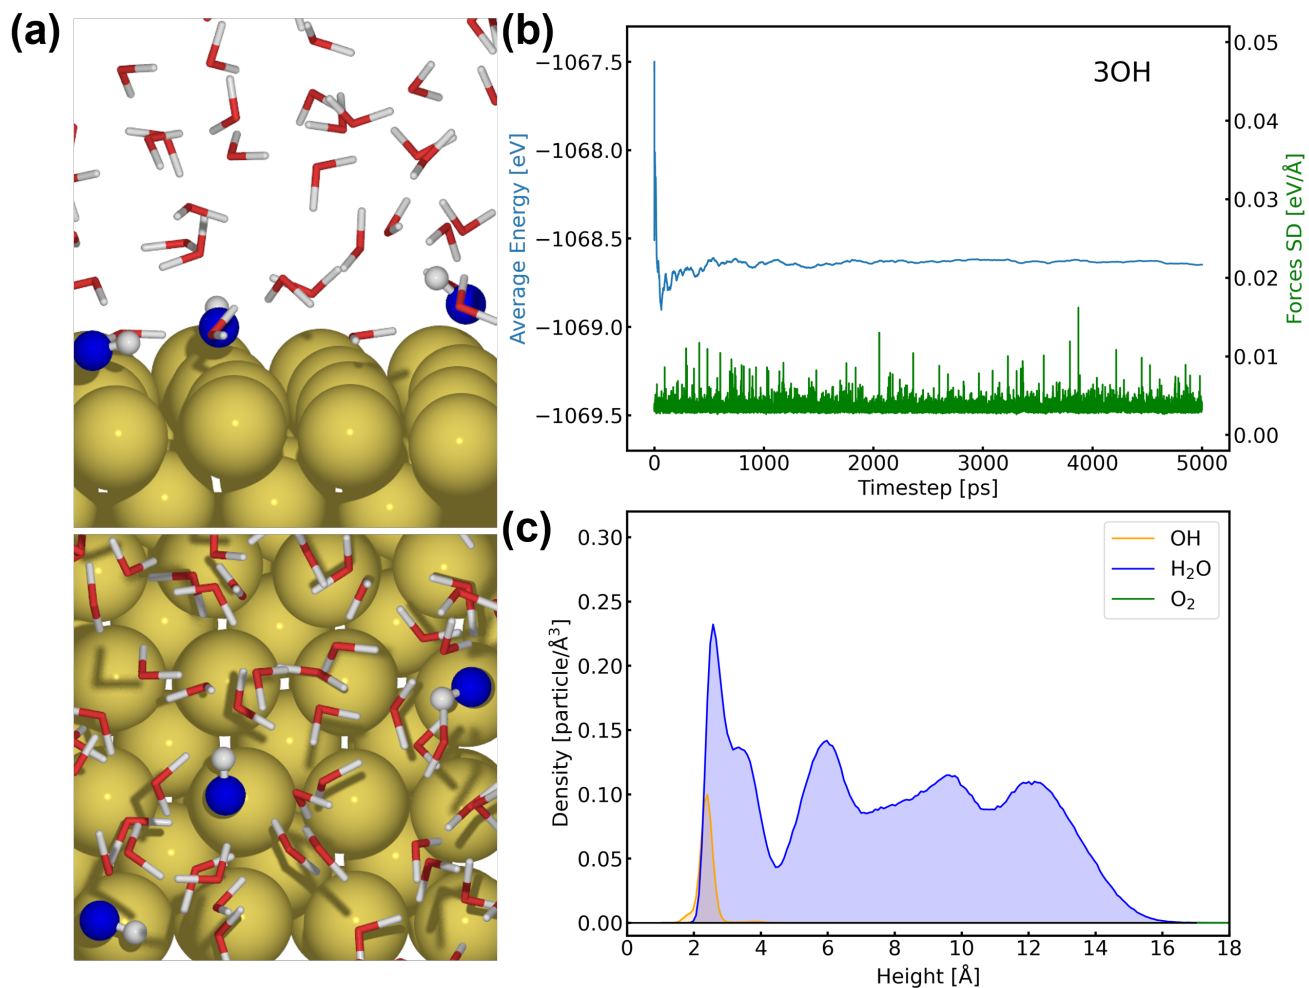

Figure S6: (a) Side view and top view of Au(100)-3OH/56H<sub>2</sub>O interface structure. (b) Evolution of average energy and force standard deviations (SD) of Au(100)-3OH/56H<sub>2</sub>O along 5 ns MD simulations. (c) Density profiles of different species as a function of the distance from Au(100) surface.

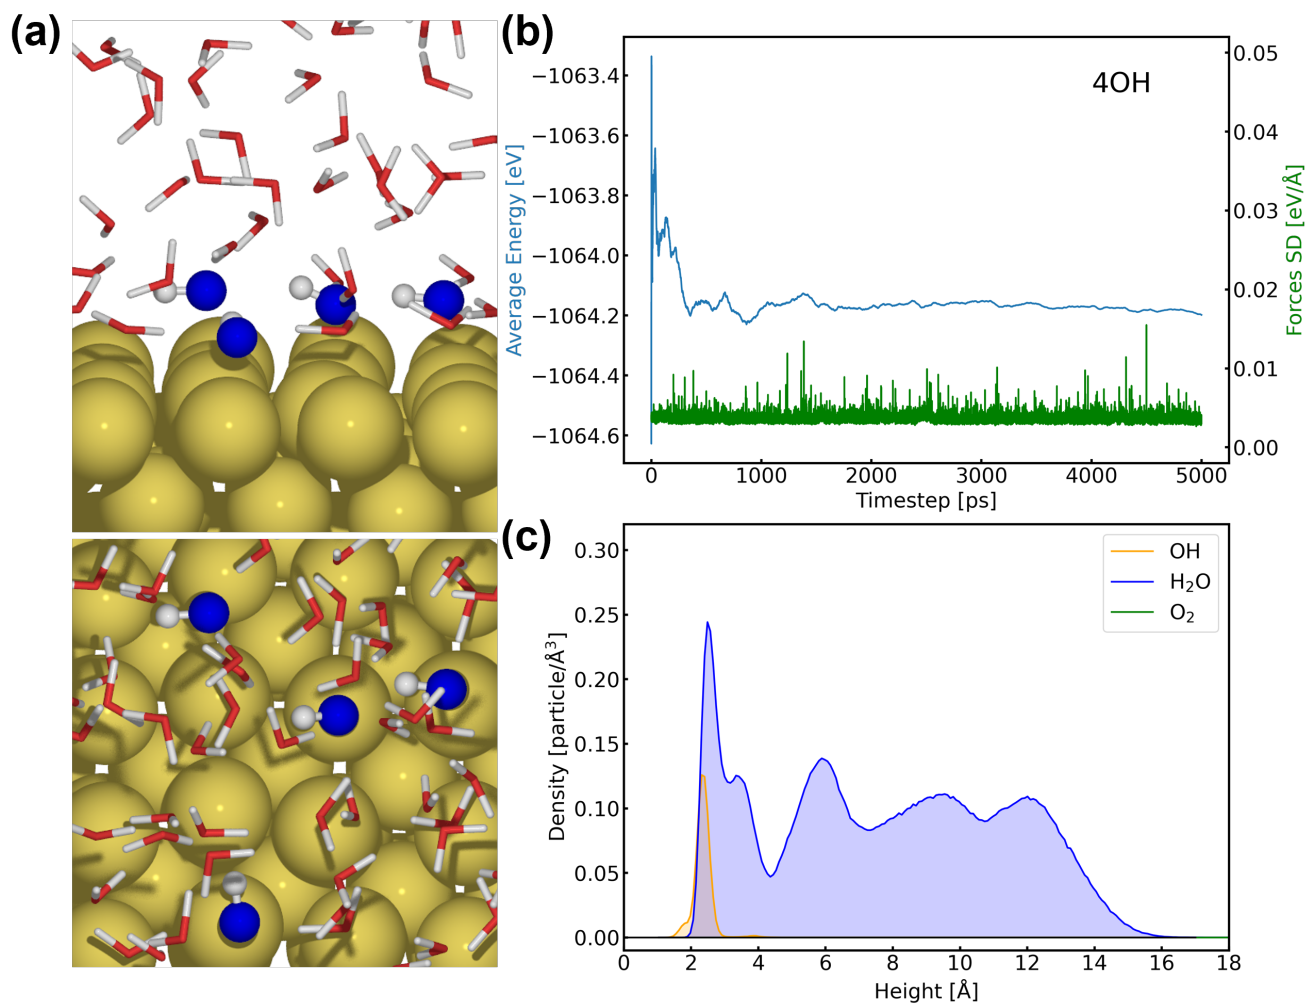

Figure S7: (a) Side view and top view of Au(100)-4OH/55H<sub>2</sub>O interface structure. (b) Evolution of average energy and force standard deviations (SD) of Au(100)-4OH/55H<sub>2</sub>O along 5 ns MD simulations. (c) Density profiles of different species as a function of the distance from Au(100) surface.

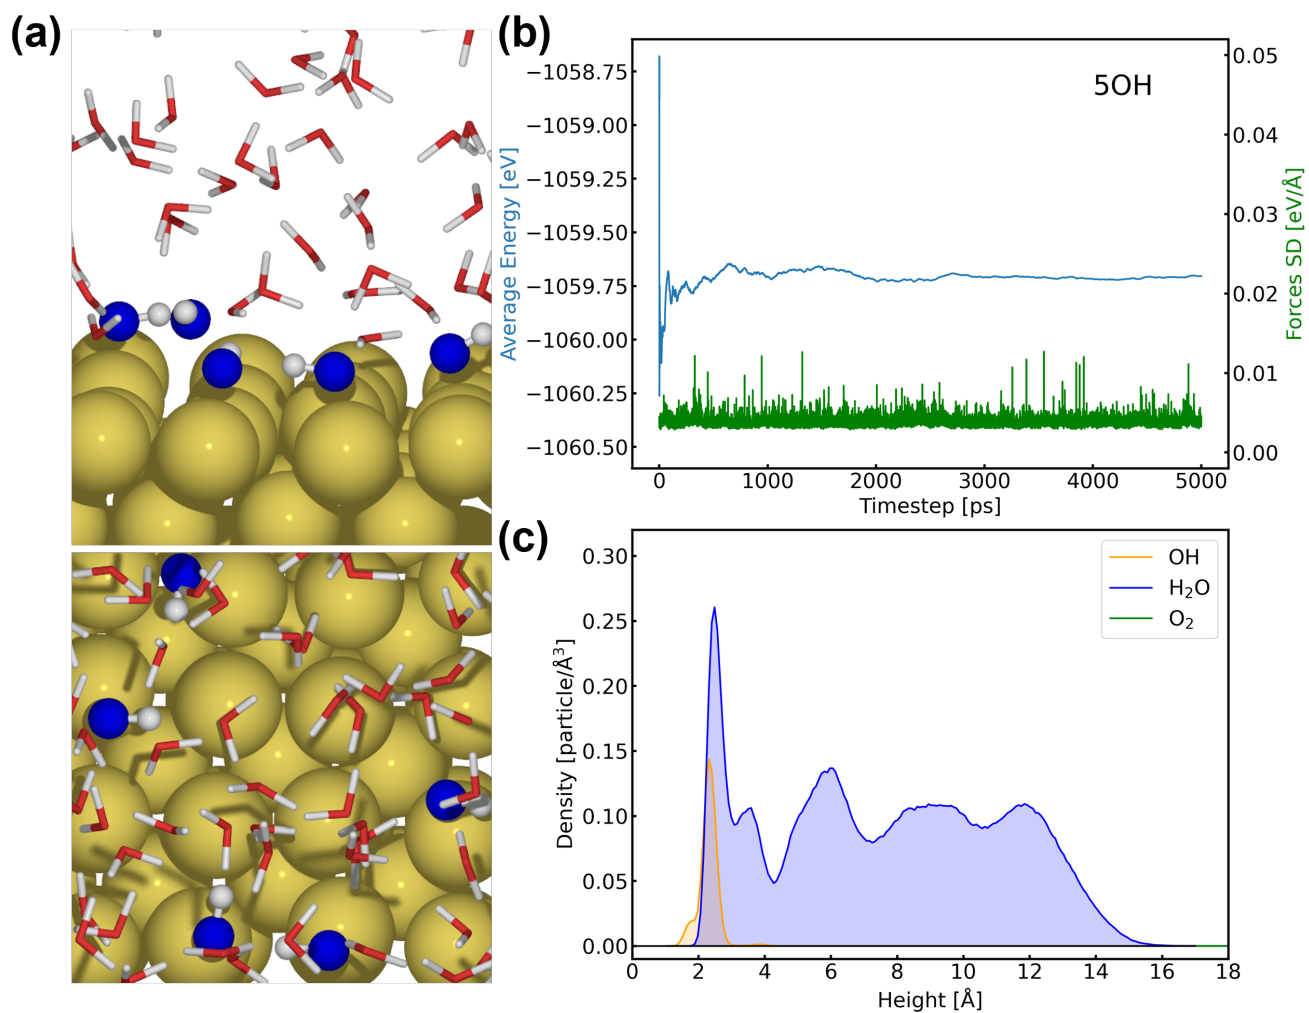

Figure S8: (a) Side view and top view of Au(100)-5OH/54H<sub>2</sub>O interface structure. (b) Evolution of average energy and force standard deviations (SD) of Au(100)-5OH/54H<sub>2</sub>O along 5 ns MD simulations. (c) Density profiles of different species as a function of the distance from Au(100) surface.



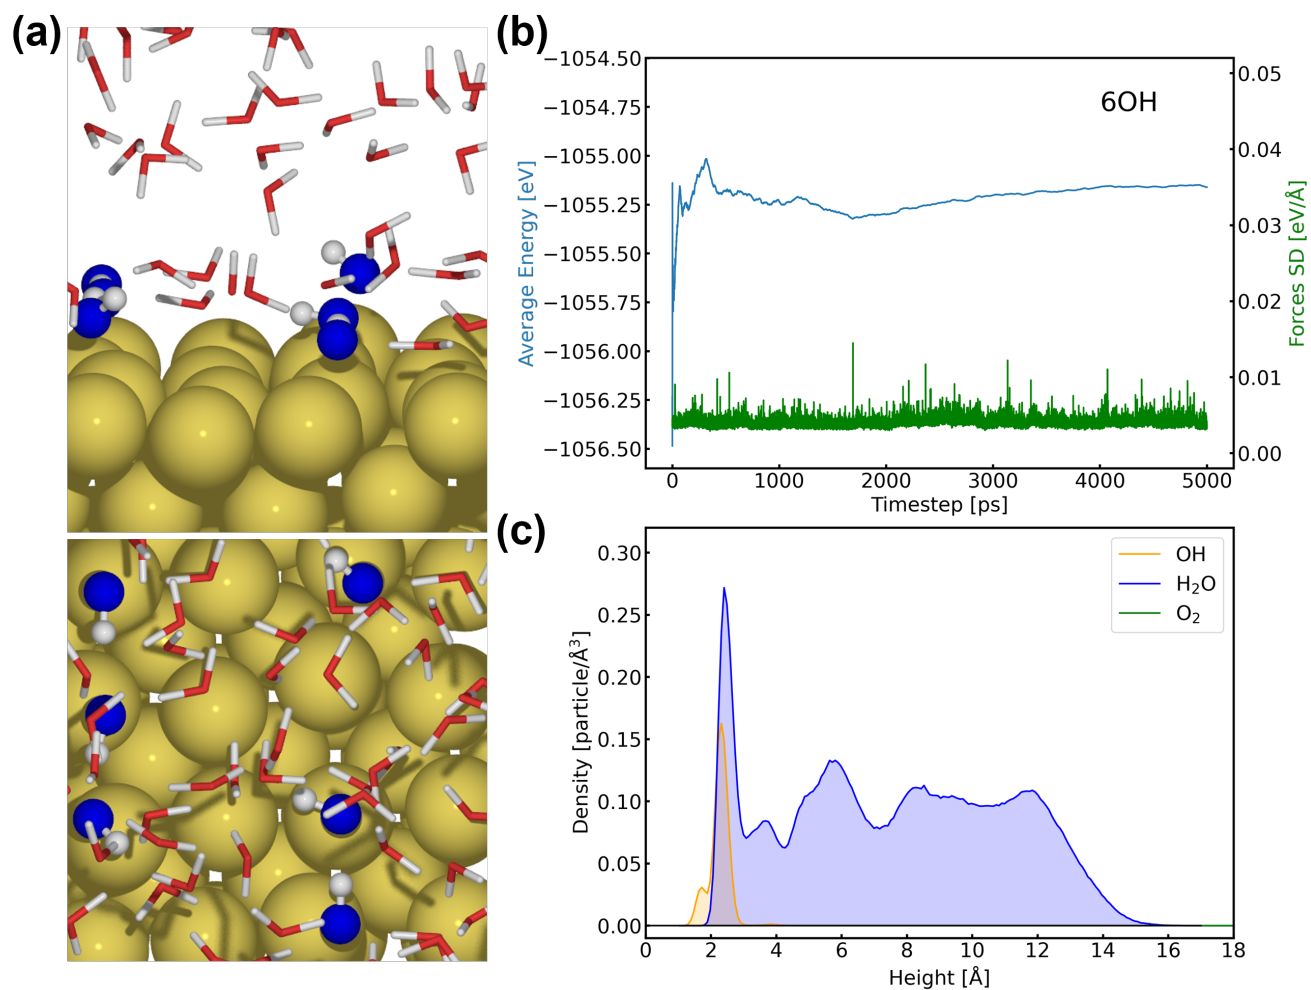

Figure S9: (a) Side view and top view of Au(100)-6OH/53H<sub>2</sub>O interface structure. (b) Evolution of average energy and force standard deviations (SD) of Au(100)-6OH/53H<sub>2</sub>O along 5 ns MD simulations. (c) Density profiles of different species as a function of the distance from Au(100) surface.

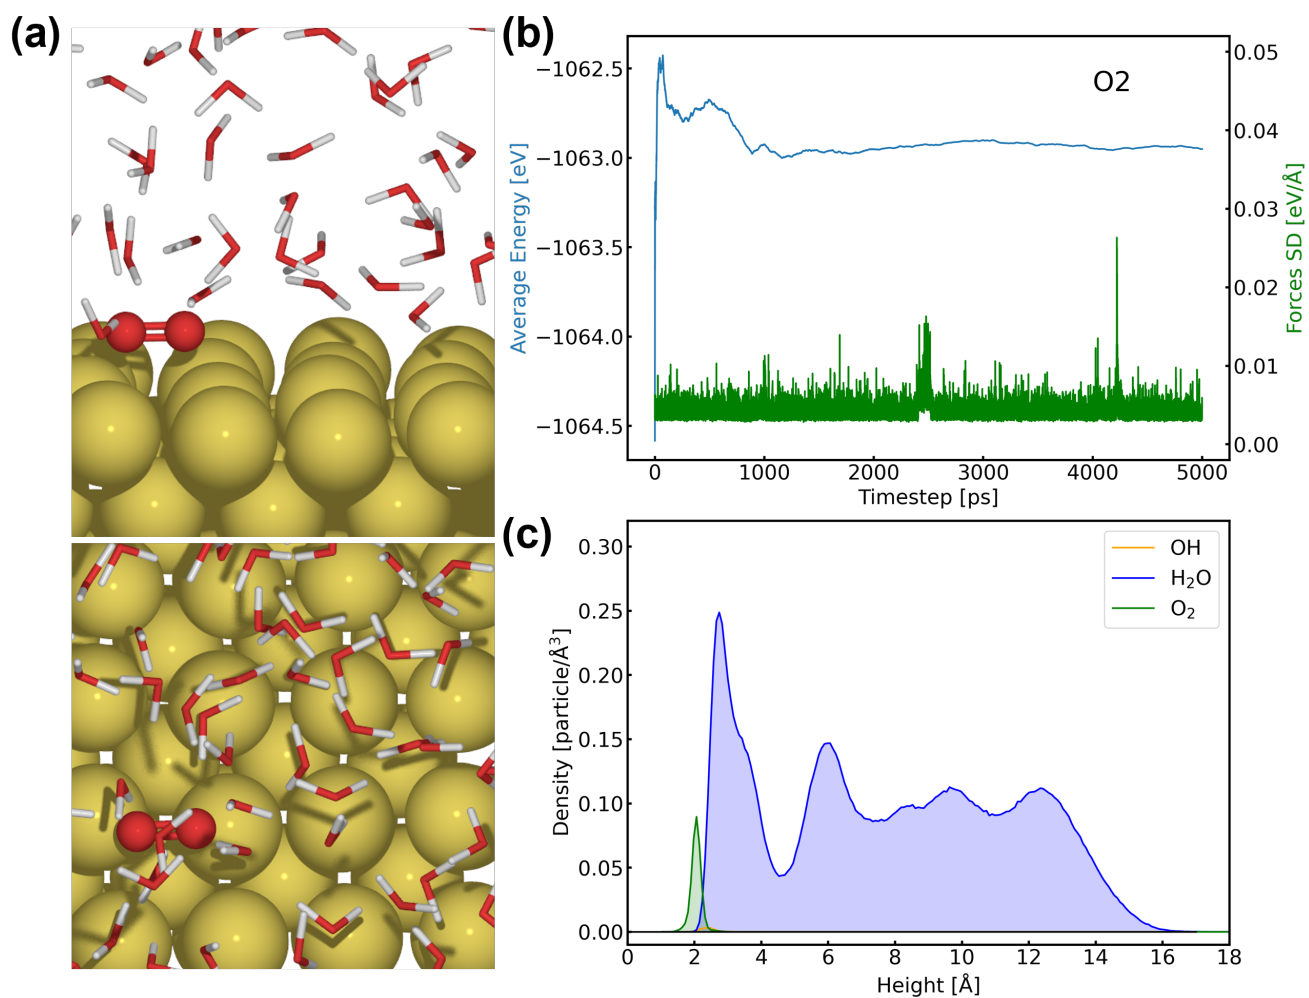

Figure S10: (a) Side view and top view of Au(100)-1O<sub>2</sub>/30H<sub>2</sub>O interface structure. (b) Evolution of average energy and force standard deviations (SD) of Au(100)-1O<sub>2</sub>/30H<sub>2</sub>O along 5 ns MD simulations. (c) Density profiles of different species as a function of the distance from Au(100) surface.

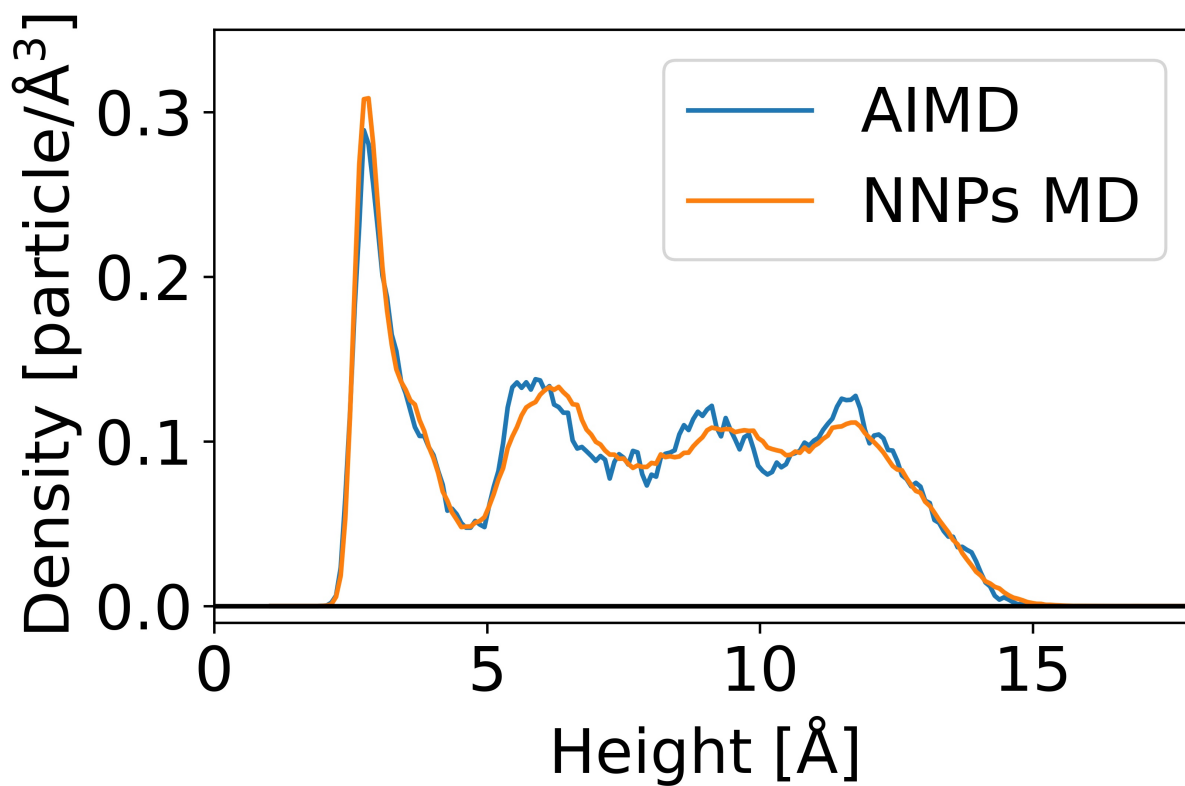

Figure S11: Density profiles of water as a function of the distance from Au(100) surface obtained from 50 ps AIMD (blue) and 5 ns NNPs MD (orange).

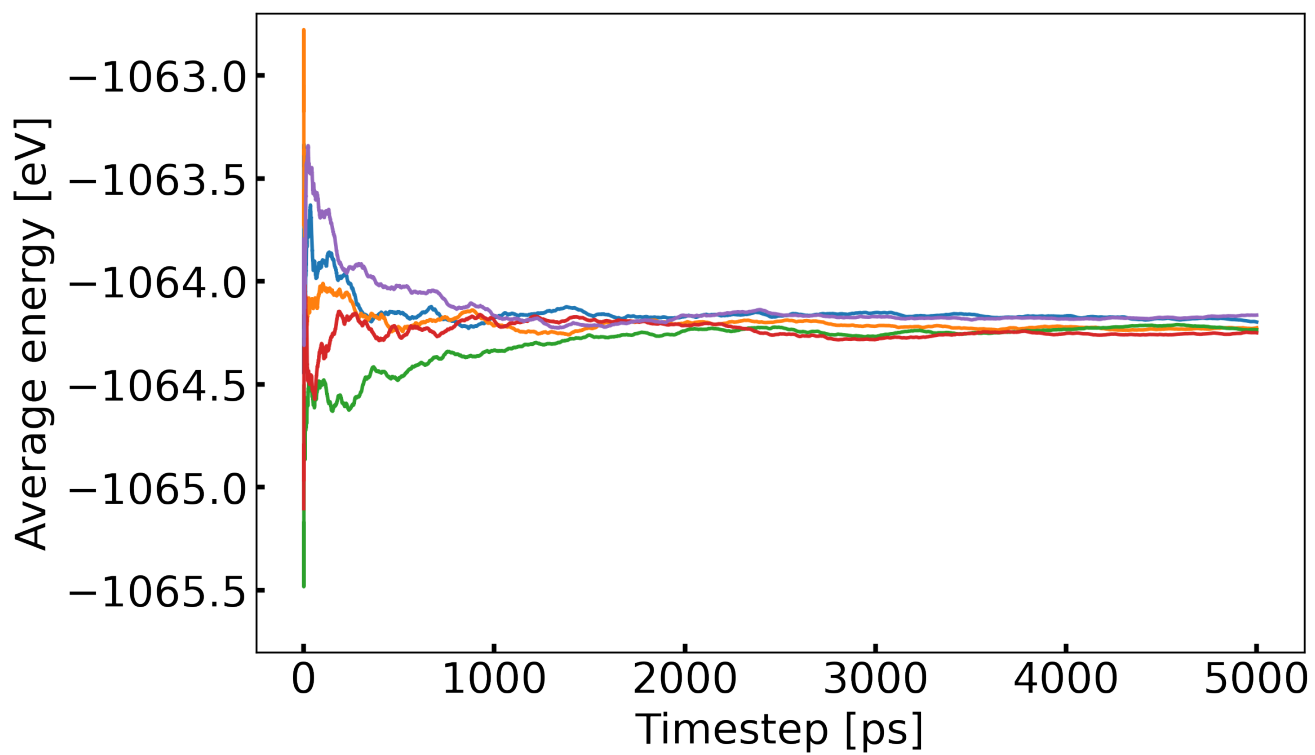

Figure S12: Average energy profiles of Au(100)-4OH/55H<sub>2</sub>O from five different starting configurations.

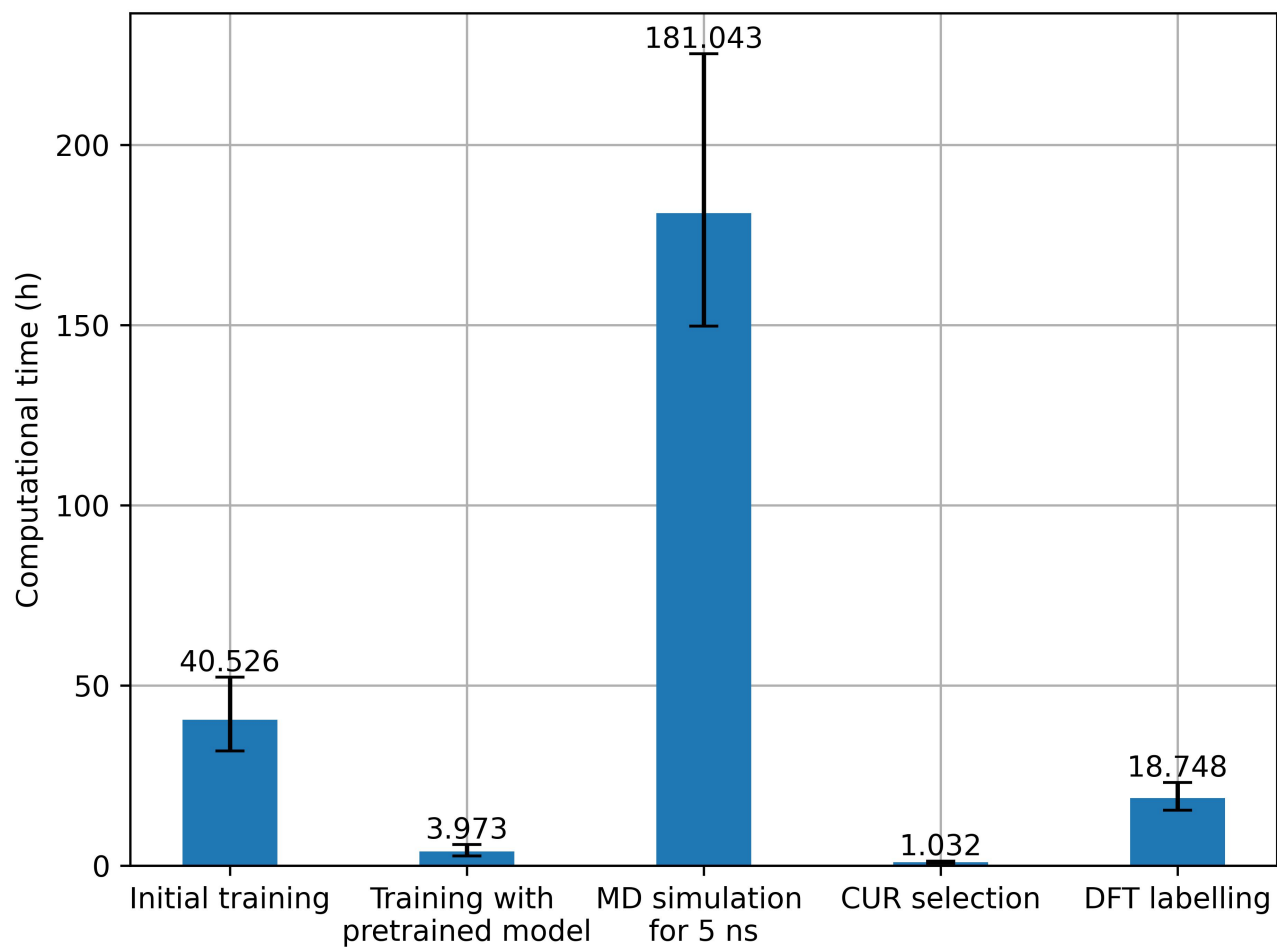

Figure S13: Computational time for training an initial model, retraining model, 5 ns NNPs MD simulation, and CUR selection. The training time of the initial model is evaluated on 1000,000 steps for five different models. By loading pretrained model parameters, retraining takes approximately 100,000 steps on average to early-stopping. DFT labelling cost is estimated by the time of labelling 100 structures using 40 CPU cores.

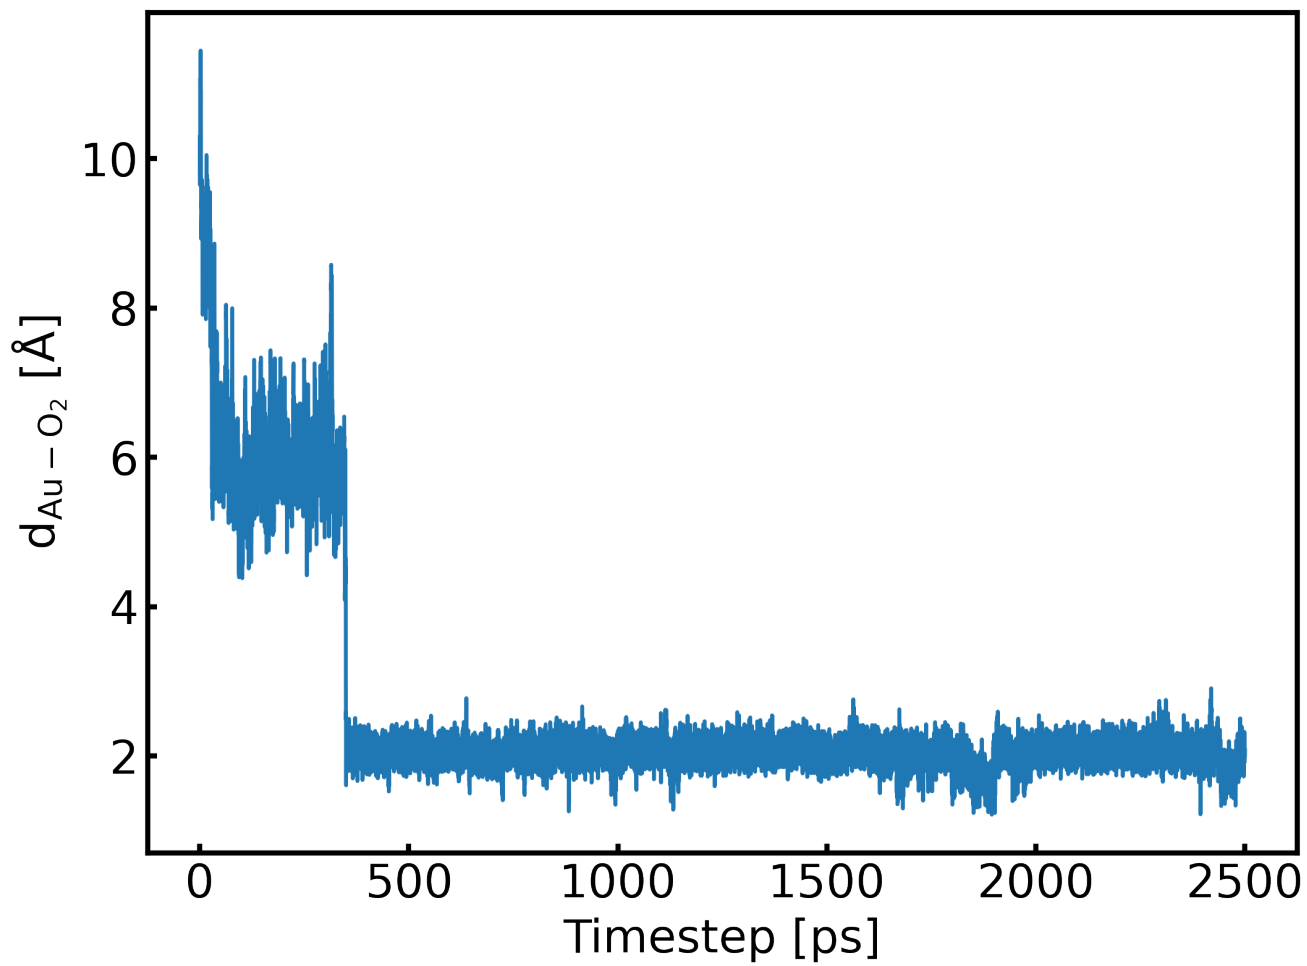

Figure S14: Evolution of the distance between  $\text{O}_2$  and Au(100) surface along 2.5 ns MD simulation

## References

- [1] S. K. Natarajan and J. Behler, *Physical Chemistry Chemical Physics*, 2016, **18**, 28704–28725.
- [2] V. Quaranta, M. Hellstrom and J. Behler, *The journal of physical chemistry letters*, 2017, **8**, 1476–1483.
- [3] M. Yang, L. Bonati, D. Polino and M. Parrinello, *Catalysis Today*, 2022, **387**, 143–149.
- [4] R. He, H. Wu, L. Zhang, X. Wang, F. Fu, S. Liu and Z. Zhong, *Physical Review B*, 2022, **105**, 064104.
- [5] Y.-B. Liu, J.-Y. Yang, G.-M. Xin, L.-H. Liu, G. Csányi and B.-Y. Cao, *The Journal of Chemical Physics*, 2020, **153**, 144501.
- [6] E. Davidson, T. Daff, G. Csanyi and M. Finnis, *Physical Review Materials*, 2020, **4**, 063804.
- [7] W. Hu, M. Shuaibi, A. Das, S. Goyal, A. Sriram, J. Leskovec, D. Parikh and C. L. Zitnick, *arXiv preprint arXiv:2103.01436*, 2021.
- [8] L. Chanussot, A. Das, S. Goyal, T. Lavril, M. Shuaibi, M. Riviere, K. Tran, J. Heras-Domingo, C. Ho, W. Hu *et al.*, *ACS Catalysis*, 2021, **11**, 6059–6072.
- [9] J. Gasteiger, M. Shuaibi, A. Sriram, S. Günnemann, Z. Ulissi, C. L. Zitnick and A. Das, *arXiv preprint arXiv:2204.02782*, 2022.
- [10] Z. Li, K. Meidani, P. Yadav and A. Barati Farimani, *The Journal of Chemical Physics*, 2022, **156**, 144103.
- [11] S. Batzner, A. Musaelian, L. Sun, M. Geiger, J. P. Mailoa, M. Kornbluth, N. Molinari, T. E. Smidt and B. Kozinsky, *Nature Communications*, 2022, **13**, 1–11.
